# Supplementary material for: Controlled porous structures of graphene aerogels and their effect on supercapacitor performance
Source: Royal Society of Chemistry journal article supplement (doi:10.1039/c4nr07564a), 2015-01-01
Supplement: c4nr07564a1.pdf [file c4nr07564a1.pdf]

## Supporting Information

### Controlled Porous Structures of Graphene Aerogels and Their Effect on Supercapacitor Performance

*Sung Mi Jung, Daniela Lopes Mafra, Cheng-Te Lin, Hyun Young Jung\*, and Jing Kong\**

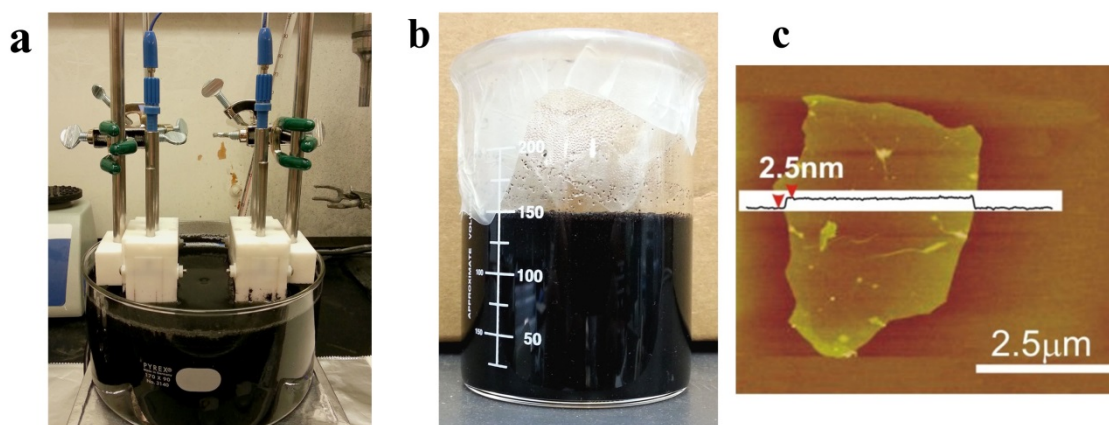

**Fig. S1** (a) Photograph of the experiment setup for the electrochemical exfoliation. Natural graphite flake is employed as two electrodes. (b) Uniformly dispersed graphene suspension. (c) AFM image of one exfoliated graphene sheet made with 30 wt% KOH in  $\text{H}_2\text{SO}_4$  electrolyte.

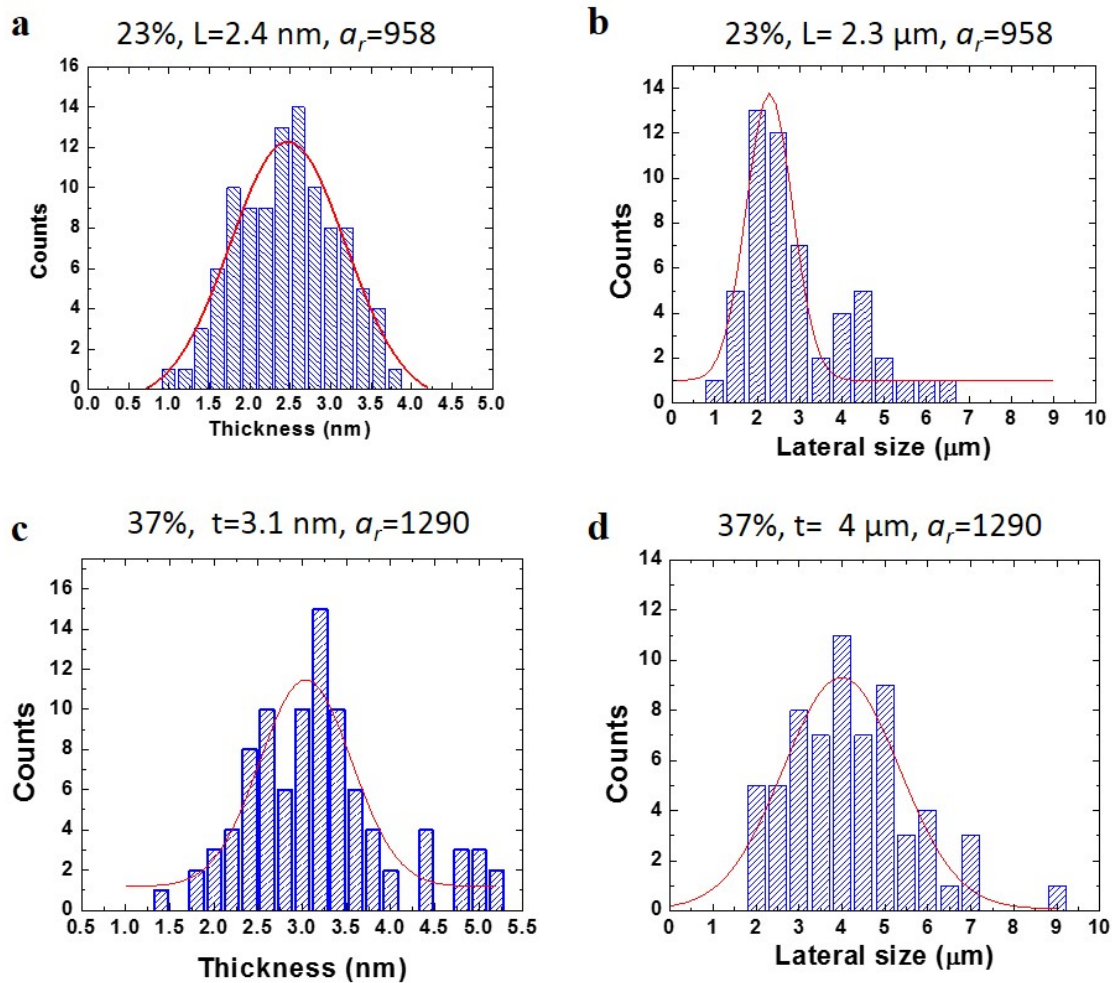

**Fig. S2** Histograms of the exfoliated graphene sheet size and thickness at 23 and 37 wt% of KOH in  $\text{H}_2\text{SO}_4$  solution. (a) and (b) the exfoliated graphene sheet size and thickness at 23 wt% of KOH. (c) and (d) the graphene sheet size and thickness at 37 wt% of KOH.

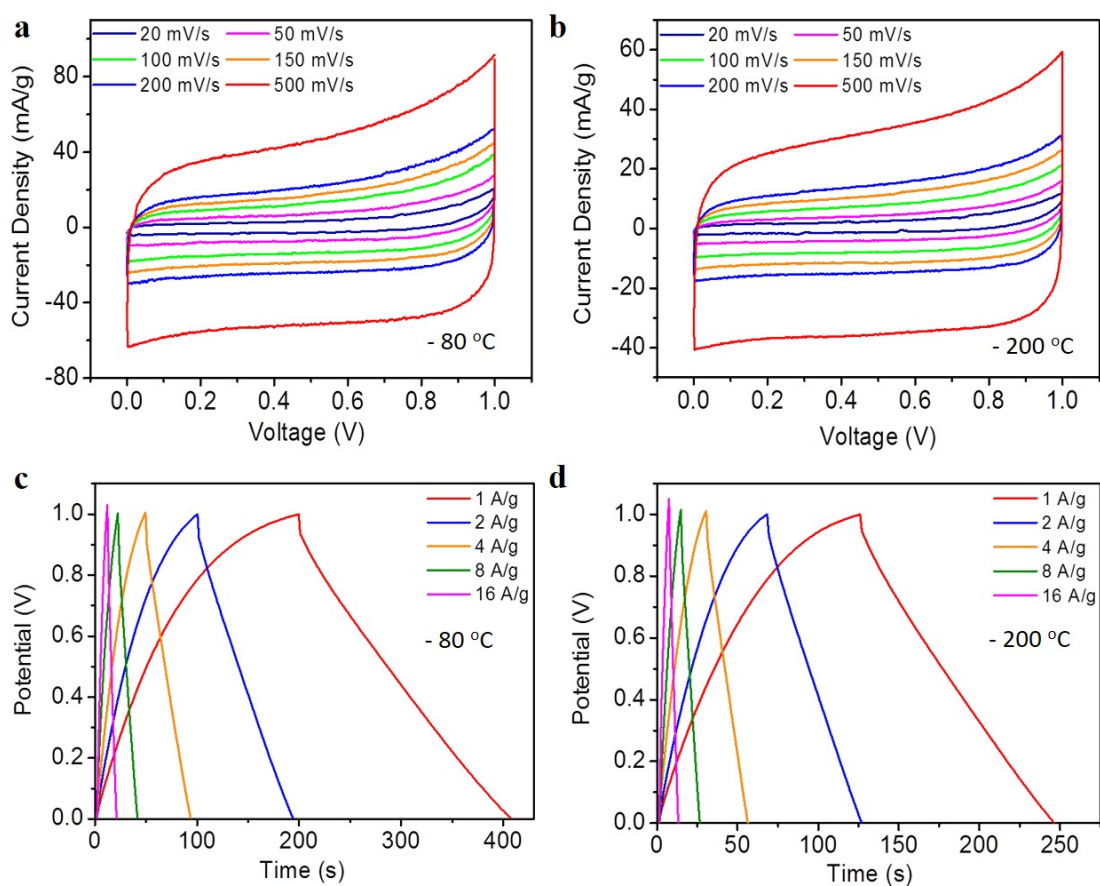

**Fig. S3** The graphene aerogel supercapacitors fabricated at freezing temperature of -80 and -200 °C. (a) and (b) the CV curve of graphene aerogel supercapacitors fabricated at freezing temperature of -80 and -200°C, respectively. (c) and (d) galvanostatic charge/discharge curves of the graphene aerogels (freezing temperature of -80 and -200 °C) supercapacitors as function of current densities.
